# Supplementary material
Source: HighWire-hosted journal article supplement (http://cmajopen.ca/highwire/filestream/84075/field_highwire_adjunct_files/1/2020-0047-original-submission.pdf)

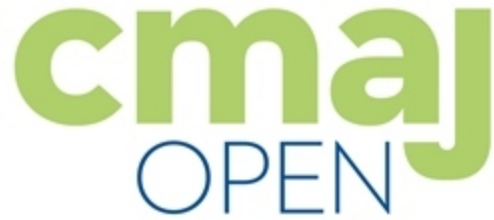

**Validation of the Clinical Chemistry Score at emergency department presentation to detect 30-day adverse cardiac events in patients with possible acute coronary syndrome**

|                               |                                                                                                                                                                                                                                                                                                                                                                                                                                                                                                                                                                                                                                                                                                                                                                                                                                                          |
|-------------------------------|----------------------------------------------------------------------------------------------------------------------------------------------------------------------------------------------------------------------------------------------------------------------------------------------------------------------------------------------------------------------------------------------------------------------------------------------------------------------------------------------------------------------------------------------------------------------------------------------------------------------------------------------------------------------------------------------------------------------------------------------------------------------------------------------------------------------------------------------------------|
| Journal:                      | <i>CMAJ Open</i>                                                                                                                                                                                                                                                                                                                                                                                                                                                                                                                                                                                                                                                                                                                                                                                                                                         |
| Manuscript ID                 | CMAJOpen-2020-0047                                                                                                                                                                                                                                                                                                                                                                                                                                                                                                                                                                                                                                                                                                                                                                                                                                       |
| Manuscript Type:              | Cohort (prospective)                                                                                                                                                                                                                                                                                                                                                                                                                                                                                                                                                                                                                                                                                                                                                                                                                                     |
| Date Submitted by the Author: | 13-Mar-2020                                                                                                                                                                                                                                                                                                                                                                                                                                                                                                                                                                                                                                                                                                                                                                                                                                              |
| Complete List of Authors:     | Kavsak, Pete; McMaster University, Pathology and Molecular Medicine<br>Cerasuolo, Joshua<br>Ko, Dennis; Institute for Clinical Evaluative Sciences ,<br>Ma, Jinhui; McMaster University, Epidemiology and Biostatistics<br>Sherbino, Jonathan; McMaster University, Emergency Medicine<br>Mondoux, Shawn<br>Clayton, Natasha; McMaster University, Medicine<br>Hill, Stephen A.; Dept. of Laboratory Medicine, Hamilton General Hospital<br>McQueen, Matthew<br>Griffith, Lauren; McMaster University, Epidemiology & Biostatistics<br>Mehta, Shamir R.; McMaster University, Medicine<br>Perez, Richard; McMaster University, ICES;<br>Seow, Hsien; McMaster University, Oncology<br>Devereaux, PJ; Population Health Research Institute, ; McMaster University, Departments of Clinical Epidemiology and Biostatistics and Medicine<br>Worster, Andrew |
| More Detailed Keywords:       | high-sensitivity cardiac troponin, emergency department, major adverse cardiac events, clinical chemistry                                                                                                                                                                                                                                                                                                                                                                                                                                                                                                                                                                                                                                                                                                                                                |
| Keywords:                     | Cardiac disease-coronary, Laboratory medicine, Health services research                                                                                                                                                                                                                                                                                                                                                                                                                                                                                                                                                                                                                                                                                                                                                                                  |
| Abstract:                     | <p>Background: The clinical chemistry score (CCS), incorporating high-sensitivity cardiac troponin I (hs-cTnI), glucose, and estimated glomerular filtration rate (eGRF) demonstrated superior clinical sensitivity (&gt;99%) for myocardial infarction (MI) as compared to hs-cTnI alone in patients with suspected symptoms of acute coronary syndrome (ACS). To ensure the validity of these findings, we sought to assess the CCS using different hs-cTnI tests, in different emergency department populations for 30-day major adverse cardiac events (MACE).</p> <p>Methods: Two different emergency department (ED) cohorts with possible ACS were evaluated: cohort 1 (n=1058 patients) with retrospective measurement of the Ortho Clinical Diagnostics hs-cTnI assay; cohort 2 (n=5974 patients) who had an ED cardiac presentation</p>        |

1  
2  
3  
4  
5  
6  
7  
8  
9  
10  
11  
12  
13  
14  
15  
16  
17  
18  
19  
20  
21  
22  
23  
24  
25  
26  
27  
28  
29  
30  
31  
32  
33  
34  
35  
36  
37  
38  
39  
40  
41  
42  
43  
44  
45  
46  
47  
48  
49  
50  
51  
52  
53  
54  
55  
56  
57  
58  
59  
60

|                                                                                                                                                                |                                                                                                                                                                                                                                                                                                                                                                                                                                                                                                                                                                                                                                                                                                                                                                                                                                                                                                                                                                                                                                                                                                                                                                                                |
|----------------------------------------------------------------------------------------------------------------------------------------------------------------|------------------------------------------------------------------------------------------------------------------------------------------------------------------------------------------------------------------------------------------------------------------------------------------------------------------------------------------------------------------------------------------------------------------------------------------------------------------------------------------------------------------------------------------------------------------------------------------------------------------------------------------------------------------------------------------------------------------------------------------------------------------------------------------------------------------------------------------------------------------------------------------------------------------------------------------------------------------------------------------------------------------------------------------------------------------------------------------------------------------------------------------------------------------------------------------------|
|                                                                                                                                                                | <p>blood test panel performed with the Abbott Diagnostics hs-cTnI assay. The sensitivity/specificity of the CCS (i.e., <math>CCS \geq 1</math>) versus hs-cTnI alone (using published cutoffs) was determined for MACE (composite of death/MI/unstable angina/revascularization) at 30-days for both cohorts and 90-days for cohort 2.</p> <p>Results: MACE rate at 30-days was higher in cohort 1 (19.4%; 95%CI: 16.8-22.2) versus cohort 2 (14.6%; 95%CI:13.6-15.6). In cohort 1, a <math>CCS \geq 1</math> yielded a sensitivity/specificity of 99.5% (95%CI: 97.3-99.9)/12.8% (95%CI: 10.6-15.2) as compared to 91.2% (95%CI: 86.5-95.7%)/39.2% (95%CI: 35.9-42.5) using the Ortho hs-cTnI <math>\geq 1</math>ng/L cutoff. A similar trend was observed in cohort 2 at 30-days and persisted at 90-days [<math>CCS \geq 1</math> sensitivity=99.2% (95%CI: 98.5-99.6) versus Abbott hs-cTnI <math>\geq 5</math>ng/L sensitivity= 87.7% (95%CI: 85.6-89.6)].</p> <p>Interpretation: A <math>CCS \geq 1</math> derived with different hs-cTnI assays and in different ED populations yielded a sensitivity above 99% and is suitable to rule-out MACE within 30-days of ED presentation.</p> |
|                                                                                                                                                                |                                                                                                                                                                                                                                                                                                                                                                                                                                                                                                                                                                                                                                                                                                                                                                                                                                                                                                                                                                                                                                                                                                                                                                                                |
| <p>Note: The following files were submitted by the author for peer review, but cannot be converted to PDF. You must view these files (e.g. movies) online.</p> |                                                                                                                                                                                                                                                                                                                                                                                                                                                                                                                                                                                                                                                                                                                                                                                                                                                                                                                                                                                                                                                                                                                                                                                                |
| <p>STARD-2015-Checklist_CMAJ_Open_Mar.13.2020.docx</p>                                                                                                         |                                                                                                                                                                                                                                                                                                                                                                                                                                                                                                                                                                                                                                                                                                                                                                                                                                                                                                                                                                                                                                                                                                                                                                                                |

SCHOLARONE™  
Manuscripts

1  
2  
3 Running Title: Clinical chemistry score and ACS  
4  
5  
6  
7

8 Validation of the Clinical Chemistry Score at emergency department presentation to detect 30-  
9  
10 day adverse cardiac events in patients with possible acute coronary syndrome  
11  
12  
13

14 Peter A Kavsak PhD<sup>1</sup> , Joshua O Cerasuolo, MSc<sup>2</sup>, Dennis T Ko MD, MSc<sup>3</sup>, Jinhui Ma PhD<sup>4</sup>,  
15  
16 Jonathan Sherbino MD<sup>5</sup>, Shawn E Mondoux MD<sup>5</sup>, Natasha Clayton<sup>6</sup>, Stephen A Hill PhD<sup>1</sup>,  
17  
18 Matthew McQueen MBChB, PhD<sup>1</sup>, Lauren E Griffith PhD<sup>4</sup>, Shamir R Mehta MD, MSc<sup>7</sup>,  
19  
20 Richard Perez, MSc<sup>2</sup>, Hsien Seow PhD<sup>2</sup>, PJ Devereaux MD, PhD<sup>7</sup>, Andrew Worster MD, MSc<sup>5</sup>  
21  
22  
23  
24  
25

26 <sup>1</sup>Department of Pathology and Molecular Medicine, McMaster University, Hamilton, ON,  
27  
28 Canada; <sup>2</sup>ICES McMaster, Faculty of Health Sciences, McMaster University, Hamilton, Canada;  
29  
30 <sup>3</sup>ICES, Toronto, Canada; <sup>4</sup>Department of Health Research Methods, Evidence, and Impact,  
31  
32 McMaster University, Hamilton, Canada; <sup>5</sup>Division of Emergency Medicine, McMaster  
33  
34 University, Hamilton, ON, Canada; <sup>6</sup>Department of Medicine, McMaster University, Hamilton,  
35  
36 ON, Canada; <sup>7</sup>Division of Cardiology, and Population Health Research Institute, McMaster  
37  
38 University, Hamilton, ON, Canada  
39  
40  
41

42 \* Corresponding author: Dr. Peter Kavsak, Juravinski Hospital and Cancer Centre, 711  
43  
44 Concession Street Hamilton, ON, Canada L8V 1C3 Tel: 905-521-2100; e-mail:  
45  
46

47 [kavsakp@mcmaster.ca](mailto:kavsakp@mcmaster.ca)  
48

49 Keywords: death; myocardial infarction; high-sensitivity cardiac troponin; emergency  
50  
51 department; low-risk, high-risk  
52  
53  
54  
55  
56  
57  
58  
59  
60

## Abstract

**Background:** The clinical chemistry score (CCS), incorporating high-sensitivity cardiac troponin I (hs-cTnI), glucose, and estimated glomerular filtration rate (eGRF) demonstrated superior clinical sensitivity (>99%) for myocardial infarction (MI) as compared to hs-cTnI alone in patients with suspected symptoms of acute coronary syndrome (ACS). To ensure the validity of these findings, we sought to assess the CCS using different hs-cTnI tests, in different emergency department populations for 30-day major adverse cardiac events (MACE).

**Methods:** Two different emergency department (ED) cohorts with possible ACS were evaluated: cohort 1 (n=1058 patients) with retrospective measurement of the Ortho Clinical Diagnostics hs-cTnI assay; cohort 2 (n=5974 patients) who had an ED cardiac presentation blood test panel performed with the Abbott Diagnostics hs-cTnI assay. The sensitivity/specificity of the CCS (i.e.,  $CCS \geq 1$ ) versus hs-cTnI alone (using published cutoffs) was determined for MACE (composite of death/MI/unstable angina/revascularization) at 30-days for both cohorts and 90-days for cohort 2.

**Results:** MACE rate at 30-days was higher in cohort 1 (19.4%; 95%CI: 16.8-22.2) versus cohort 2 (14.6%; 95%CI:13.6-15.6). In cohort 1, a  $CCS \geq 1$  yielded a sensitivity/specificity of 99.5% (95%CI: 97.3-99.9)/12.8% (95%CI: 10.6-15.2) as compared to 91.2% (95%CI: 86.5-95.7%)/39.2% (95%CI: 35.9-42.5) using the Ortho hs-cTnI  $\geq 1$ ng/L cutoff. A similar trend was observed in cohort 2 at 30-days and persisted at 90-days [ $CCS \geq 1$  sensitivity=99.2% (95%CI: 98.5-99.6) versus Abbott hs-cTnI  $\geq 5$ ng/L sensitivity= 87.7% (95%CI: 85.6-89.6)].

1  
2  
3 **Interpretation:** A  $CCS \geq 1$  derived with different hs-cTnI assays and in different ED populations  
4  
5 yielded a sensitivity above 99% and is suitable to rule-out MACE within 30-days of ED  
6  
7 presentation.  
8  
9

10  
11  
12 **Trial registration:** ClinicalTrials.gov Identifier: NCT01994577  
13  
14

15  
16  
17 Word Count = 250(max for Abstract 250)  
18  
19

20  
21  
22  
23  
24  
25  
26  
27  
28  
29  
30  
31  
32  
33  
34  
35  
36  
37  
38  
39  
40  
41  
42  
43  
44  
45  
46  
47  
48  
49  
50  
51  
52  
53  
54  
55  
56  
57  
58  
59  
60

Confidential

## Introduction

Evidence and guidelines have indicated that an undetectable or low high-sensitivity cardiac troponin (hs-cTn) concentration at emergency department (ED) presentation may be suitable in certain patients to rule-out myocardial infarction (MI) and possibly discharge patients home.<sup>1-4</sup> The basis for this is the high clinical sensitivity and negative predictive value (NPV) which can be attained when using an hs-cTn cutoff close to 5 ng/L.<sup>2,3,5,6</sup> However, the ability to rule-out MI does not necessarily equate to low-risk for a subsequent cardiovascular event. An international survey of ED physicians indicated that an acceptable miss-rate of major adverse cardiac events (MACE) would be  $\leq 1\%$  within 30-days.<sup>7</sup> Accordingly, the sensitivity required for MACE at 30-days should be  $\geq 99\%$  to achieve this threshold and to allow discharge and cessation of investigations in patients presenting with possible acute coronary syndrome (ACS) to the ED.<sup>7</sup> Therefore, uncertainty exists on whether a single low hs-cTn cutoff at presentation provides sufficient sensitivity to exclude 30-day MACE, with the American College of Emergency Physicians latest clinical policy document issuing the following statement “a single high-sensitivity troponin may not have adequate sensitivity for MACE”.<sup>8</sup> A recent study in patients with suspected ACS in the United States for 30-day death, MI and myocardial revascularization identified that two measurements (0 and 3 hours)  $< 6$  ng/L by a hs-cTn assay achieved a NPV of 99.3%, but no data were provided for the sensitivity and NPV for the presentation (0 hour) measurement alone using this low cutoff.<sup>9</sup>

We have previously demonstrated in over 4000 patients enrolled in clinical studies assessing hs-cTn in patients with suspected ACS that a simple clinical chemistry score (CCS)

1  
2  
3 test provided superior sensitivity for index MI and 30-day MI or death over the first two hs-cTn  
4 assays approved by Health Canada, namely Roche hs-cTnT and Abbott hs-cTnI.<sup>10</sup> Since this  
5 publication, three additional companies (Beckman Coulter, Siemens Healthcare Diagnostics, and  
6 Ortho Clinical Diagnostics) have gained regulatory approval for hs-cTnI assays by Health  
7 Canada.<sup>11-14</sup> There is no standardization between hs-cTnI assays, so the same sample tested with  
8 different hs-cTnI assays may give very different results (not relevant for hs-cTnT, as Roche is  
9 the sole manufacturer)<sup>15,16</sup>. The goal of this study was to determine if the CCS, using different  
10 hs-cTnI assays, will achieve the same diagnostic performance  $\geq 99\%$  sensitivity, and superiority  
11 over hs-cTnI alone, for 30-day MACE, outside the clinical study setting and in a general ED  
12 population being worked-up for possible acute cardiac injury.  
13  
14  
15  
16  
17  
18  
19  
20  
21  
22  
23  
24  
25  
26  
27

## 28 **Methods**

### 29 *Study Design and Participants*

30  
31  
32  
33 After research ethics board approval, two ED cohorts that had parallel hs-cTn and conventional  
34 troponin measurements performed were selected for this study; hs-cTn results remained  
35 unreported to the treating ED physician. This was accomplished in accordance with the  
36 Standards for the Reporting of Diagnostic Accuracy Studies guideline.  
37  
38  
39  
40  
41  
42  
43

44 Cohort 1 was the Canadian cohort used in the initial publication on the CCS.<sup>10</sup> Briefly,  
45 this was an observational cohort study (NCT01994577) which enrolled patients (May 2013 to  
46 August 2013) presenting to the ED from three adult hospitals within Hamilton, Ontario. Eligible  
47 patients were 18 years of age and older, not transferred from a different hospital, and had a  
48 cardiac troponin ordered by an ED physician. Patients were excluded if their symptoms were  
49  
50  
51  
52  
53  
54  
55  
56  
57  
58  
59  
60

1  
2  
3 non-ACS; or had ST-segment elevation MI (STEMI) at presentation; or had chest trauma,  
4  
5 cardiac surgery or manipulation within 30-days of presentation; a MI (STEMI or non-STEMI) or  
6  
7 pulmonary embolus confirmed within the previous month; known active cancer or non-cardiac  
8  
9 fatal illness; sepsis; ventricular fibrillation or sustained ventricular tachycardia.<sup>10,17-19</sup>

10  
11 Ethylenediaminetetraacetic acid (EDTA) plasma samples were collected and stored below - 70°

12  
13  
14 C. Further selection for the cohort was dependent of the availability of a presentation sample  
15  
16 with sufficient volume to obtain a result for the Ortho VITROS® hs-cTnI assay (Ortho Clinical  
17  
18 Diagnostics, Pencoed, UK) (Figure 1).

19  
20  
21 Cohort 2 was also from an observational study (November 2012 to February 2013) where  
22  
23 consecutive ED patients who visited the ED from the three adult hospitals within Hamilton,  
24  
25 Ontario and had a cardiac troponin I ordered also had a hs-cTnI measurement performed on the  
26  
27 same tube (Abbott ARCHITECT® hs-cTnI measured but not reported).<sup>20</sup> Patients were excluded  
28  
29 if age or sex was missing in the registered persons database (RPDB), were not an Ontario  
30  
31 resident or Ontario Health Insurance Plan (OHIP)-eligible, or did not have glucose and creatinine  
32  
33 results at presentation (note, in Hamilton there is an order-set: ED cardiac laboratory order-set  
34  
35 where in addition to troponin, glucose, creatinine and other blood tests are measured) (Figure 1).

### 36 37 38 39 40 41 42 ***Health Outcomes***

43  
44 The outcome for this analysis was MACE that occurred after the presentation blood work up to  
45  
46 30-days in both cohorts and 90-days in cohort 2. MACE was defined as the composite outcome  
47  
48 of MI, unstable angina, revascularization [e.g., percutaneous coronary intervention (PCI) or  
49  
50 coronary artery bypass grafting (CAGB)] or all-cause death. In cohort 1, an emergency physician  
51  
52  
53  
54  
55  
56  
57  
58  
59  
60



1  
2  
3 led an adjudication panel with the outcomes independently adjudicated by at least two members  
4  
5 with disagreements not resolved by consensus referred to a third blinded reviewer.<sup>10</sup>  
6  
7

8 In cohort 2, adjudication was not performed; rather administrative and clinical databases  
9  
10 linked at ICES (Toronto, Ontario) were used via unique encrypted patient identifiers to obtain  
11  
12 past medical history and outcomes (all-cause death, or hospitalization from MI or unstable  
13  
14 angina, or PCI/CABG).<sup>21</sup> Briefly, the Ontario RPDB contained all information on patient  
15  
16 demographics and death date. All inpatient hospital discharges and same day surgeries were  
17  
18 captured in the CIHI Discharge Abstract Database (DAD) and Same Day Surgery Database  
19  
20 (SDS), respectively. The OHIP database captured all physician billings and outpatient visits (see  
21  
22 Supplemental Methods for additional details regarding health outcomes).  
23  
24  
25  
26  
27

### 28 ***Laboratory methods and Cutoffs***

29  
30 The hs-cTnI assay selected for measurement in cohort 1 was from Ortho Clinical Diagnostics. As  
31  
32 compared to other companies' hs-cTnI assays, the Ortho hs-cTnI assay generally yields the  
33  
34 lowest cTnI concentrations.<sup>12-14,22</sup> This was supported by testing performed on patient pool  
35  
36 quality control material used to validate hs-cTnI assays (published mean concentrations on this  
37  
38 material were Beckman hs-cTnI=3.4 ng/L; Abbott hs-cTnI=5.1 ng/L; Siemens Centaur hs-  
39  
40 cTnI=5.0 ng/L and Siemens EXL hs-cTnI=8.6 ng/L)<sup>11,13,23,24</sup> where measurement of this material  
41  
42 by the Ortho hs-cTnI assay yielded the lowest concentration (Ortho hs-cTnI mean=1.1 ng/L with  
43  
44 precision <10%). Suitability of frozen samples (below -70°C for over 15 years) has also been  
45  
46 demonstrated for the Ortho hs-cTnI assay, consistent with other assays.<sup>14,25</sup> In addition to  
47  
48 conventional cardiac troponin I which was reported to the treating ED physician for the standard  
49  
50 of care diagnosis, Abbott hs-cTnI testing was also performed on cohort 2 but remained  
51  
52  
53  
54  
55  
56  
57  
58  
59  
60

1  
2  
3 unreported.<sup>20</sup> All cardiac troponin testing performed in both cohort 1 and cohort 2 are consistent  
4 with laboratory quality recommendations published in 2018.<sup>15</sup> Glucose and creatinine  
5 measurements were from standard acceptable laboratory methods (Abbott ARCHITECT  
6 analyzer), with the CKD-EPI equation used to derive the estimated glomerular filtration rate  
7 (eGFR)<sup>26</sup>, only after the studies were completed (i.e., eGFR result by this equation was not  
8 clinically reported during the enrolment).  
9

10  
11  
12  
13  
14  
15  
16  
17 The cutoffs selected were a CCS  $\geq 1$  and a hs-cTnI  $\geq 5$  ng/L alone as both of these cutoffs  
18 have been reported in the literature for ruling-out MI, with 5 ng/L proposed as a common cutoff  
19 for hs-cTn assays.<sup>3,6,10,27</sup> A second cutoff for the Ortho hs-cTnI assay  $\geq 1$  ng/L was also evaluated  
20 as this cutoff has recently been reported for the European Society of Cardiology 0/1 h  
21 algorithm.<sup>28</sup> Briefly, the CCS calculation includes glucose, eGFR and hs-cTnI with the cutoffs  
22 chosen selected based on accepted normal levels and low-risk clinical cut-points and has a range  
23 of 0-5 points.<sup>10</sup> For example, a CCS  $< 1$  would be patients with an eGFR  $\geq 90$  mL/min/1.73m<sup>2</sup>, a  
24 glucose  $< 5.6$  mmol/L and an hs-cTnI  $< 4$  ng/L (a normal concentration by all hs-cTnI assays)<sup>29</sup>,  
25 and would represent a biochemically healthy individual.<sup>10</sup>  
26  
27  
28  
29  
30  
31  
32  
33  
34  
35  
36  
37  
38  
39

#### 40 ***Statistical Analyses***

41  
42  
43  
44 The diagnostic test parameters: sensitivity, specificity, NPV, and positive predictive value (PPV)  
45 with 95% confidence intervals (CIs) were calculated using CCS  $\geq 1$  and hs-cTnI  $\geq 5$  ng/L as the  
46 cutoffs in both cohorts. Additionally, in cohort 1 a hs-cTnI  $\geq 1$  ng/L cutoff was also evaluated.  
47  
48  
49  
50  
51  
52  
53  
54  
55  
56  
57  
58  
59  
60  
Common variables between both cohorts were calculated (mean, standard deviation, or  
percentages). Clinical significance of the test would be ascertained if the point estimate of the

1  
2  
3 sensitivity was  $\geq 99\%$ .<sup>7,8</sup> In cohort 2, counts  $\leq 5$  were not reported to protect privacy per ICES  
4 protocols.<sup>21</sup> Accordingly, if counts  $\leq 5$  were obtained at 30-days, an additional analysis would be  
5 performed at 90-days to obtained numbers to calculate the 95% CIs. Statistical analyses were  
6 performed using SAS 9.1.3 software (SAS Institute Inc, Cary, NC) and MedCalc Statistical  
7 Software version 19.1.6 (MedCalc Software Ltd, Ostend, Belgium).  
8  
9  
10  
11  
12  
13  
14  
15  
16

## 17 Results

18  
19  
20  
21 In both cohort 1 (n = 1058) and cohort 2 (n = 5974) the average age exceeded 65 years (67 years  
22 and 68 years, respectively) with over half of the population being women (53% and 51%,  
23 respectively) (Table 1). The presentation hs-cTnI concentration was normal (i.e., below the 99<sup>th</sup>  
24 percentile cutoff which is designated as the upper limit of normal) in over three quartiles of the  
25 population (80% in cohort 1 and 79% in cohort 2). The MACE rate at 30-days was higher in  
26 cohort 1 (19.4%; 95%CI: 16.8 to 22.2) as compared to cohort 2 (14.6%; 95%CI: 13.6 to 15.6)  
27 (p<0.01).  
28  
29  
30  
31  
32  
33  
34  
35  
36

37 In cohort 1, there were 110 patients with a CCS <1 (10.4% of total population), with 1 of  
38 these patients having an event at 30-days (0.9%) (Table 2). Applying a CCS  $\geq 1$  cutoff yielded a  
39 sensitivity of 99.5% (95%CI: 97.3 to 99.9) and NPV of 99.1% (95%CI: 93.9 to 99.9). In contrast,  
40 there were 722 patients with Ortho hs-cTnI concentrations <5 ng/L (68.3% of total population),  
41 with 53 of these patients having an event at 30-days (7.3%). Applying a hs-cTnI  $\geq 5$  ng/L cutoff  
42 yielded a sensitivity of 74.2% (95%CI: 67.6 to 80.0) and NPV of 92.7% (95%CI: 90.9 to 94.1).  
43 Lowering the Ortho hs-cTnI cutoff to  $\geq 1$  ng/L (352 patients with 18 outcomes (5.1%) for hs-cTnI  
44 <1 ng/L) yielded a sensitivity of 91.2% (95%CI: 86.5 to 94.7) and NPV of 94.9% (95%CI: 92.2  
45  
46  
47  
48  
49  
50  
51  
52  
53  
54  
55  
56  
57  
58  
59  
60

1  
2  
3 to 96.7). The specificity was lower for  $CCS \geq 1$  as compared to  $hs-cTnI \geq 1$  ng/L [12.8% (95%CI:  
4 10.6 to 14.2) versus 39.2% (95%CI: 35.9 to 42.5)].  
5  
6

7  
8 In cohort 2, there were 399 patients with a  $CCS < 1$  (6.7% of the total population), with  
9  $\leq 5$  patients having an event at 30-days. The point estimates at 30-days for sensitivity/NPV for  
10  $CCS \geq 1$  were  $\geq 99\%$ . By comparison, there were 103 outcomes in 2374 patients (4.3%) with  
11 Abbott ARCHITECT  $hs-cTnI$  concentrations  $< 5$  ng/L. Applying the  $hs-cTnI \geq 5$  ng/L cutoff  
12 yielded a sensitivity of 88.1% (95%CI: 85.8 to 90.2) and NPV of 95.6% (95%CI: 94.7 to 96.4).  
13  
14 At 90-days, the MACE rate was lower in the  $CCS < 1$  group (2.0%; 95%CI: 0.9 to 4.0) versus  
15 those with Abbott ARCHITECT  $hs-cTnI$  concentrations  $< 5$  ng/L (5.7%; 95%CI: 4.8 to 6.7)  
16 (p<0.01). The sensitivity of  $CCS \geq 1$  was 99.2% (95%CI: 98.5 to 99.6) as compared to  $hs-cTnI$   
17  $\geq 5$  ng/L sensitivity of 87.7% (95%CI: 85.6 to 89.6). The specificity was lower for  $CCS \geq 1$  as  
18 compared to  $hs-cTnI \geq 5$  ng/L [12.8% (95%CI: 10.6 to 14.2) versus 39.2% (95%CI: 35.9 to  
19 42.5)] at 90-days (Table 3). Combining the  $CCS \geq 1$  from both cohorts, the 30-day MACE rate  
20 would be  $\leq 1\%$  ( $\leq 6$  from 509 patients).  
21  
22  
23  
24  
25  
26  
27  
28  
29  
30  
31  
32  
33  
34  
35  
36  
37  
38  
39

## 40 Interpretation

41  
42  
43  
44 Patients with a  $CCS < 1$  with the ED presentation blood work have a rate of MACE at 30-days  
45  $\leq 1\%$ , with the  $CCS \geq 1$  cutoff yielding a sensitivity  $\geq 99\%$ . Both of these metrics indicate that ED  
46 patients with possible ACS who have a  $CCS < 1$  are a low-risk group of patients which should  
47 enable ED physicians to consider discharge and the cessation of additional investigations in the  
48 ED for current and subsequent ACS over the short-term.  
49  
50  
51  
52  
53  
54  
55  
56  
57  
58  
59  
60

1  
2  
3 With the advent of hs-Tn testing there have been gains made in the ED for reducing the  
4 time between blood draws for testing when evaluating patients with possible ACS.<sup>1,30</sup> Also, with  
5 the hs-cTn assays, there is evidence to support a low hs-cTn concentration may be used to rule-  
6 out MI at ED presentation.<sup>1-6</sup> However, there are important caveats to using a low hs-cTnI  
7 concentration alone for decision-making in the ED: 1) patients who present early after pain onset  
8 may be misdiagnosed; 2) ruling-out MI does not equate patient discharge as patients may still be  
9 at risk for ischemic events; and 3) analytical imprecision at the low end for hs-cTn assays may  
10 result in patient misclassification.<sup>4,31,32</sup> Moreover, in an attempt to simplify interpretation of a  
11 low hs-cTn concentration some have advocated and studies have assessed a single cutoff of <5  
12 ng/L.<sup>2,3,5,27</sup> This approach may be suitable for hs-cTnI assays if there is close agreement to the  
13 Abbott hs-cTnI assay at this cutoff; as this assay has been assessed in large multicenter studies  
14 assessing MI.<sup>3,19</sup>

15  
16  
17  
18  
19  
20  
21  
22  
23  
24  
25  
26  
27  
28  
29  
30  
31 However, our findings indicate that the 5 ng/L cutoff alone at presentation for the Ortho  
32 hs-cTnI assay would be unsafe with over 7% of patients with hs-cTnI concentrations <5 ng/L  
33 having MACE with a sensitivity below 75% at this cutoff. Lowering the hs-cTnI threshold to 1  
34 ng/L as used in the 0/1h algorithm with the Ortho hs-cTnI assay yields sensitivity (91%) close to  
35 the Abbott hs-cTnI assay when using the 5 ng/L cutoff (88%). Importantly, both estimates by  
36 these different hs-cTnI assays would be too low to exclude MACE. Only the CCS  $\geq 1$  with both  
37 assays in two different populations obtained the required sensitivity ( $\geq 99\%$ ) to rule-out MACE  
38 at 30-days.

### 51 ***Limitations***

1  
2  
3 As with any observational study there are limitations. First, ED physicians were not exposed to  
4 the hs-cTnI results or the CCS so the impact/intervention of applying either hs-cTnI  $\geq 5$  ng/L or  
5 the CCS  $\geq 1$  cannot be assessed. Second, these two different populations share a common  
6  
7  
8  
9  
10 variable in that both occurred at hospitals within the city of Hamilton; as such the impact of  
11  
12 different geographic locations on the CCS cannot be assessed. However, previous studies across  
13  
14 different countries and across different provinces within Canada have demonstrated close  
15  
16 agreement of the CCS in different geographical locations and using different hs-cTn assays.<sup>10,33</sup>  
17  
18  
19 Third, as the Ortho hs-cTnI assay was measured in samples collected in 2013, there might have  
20  
21 been some degradation in analyte; and as the latest hs-cTnI assay approved by Health Canada,  
22  
23 real world analytical precision data for this assay is unknown. However, there are data to  
24  
25 support the long-term stability of the cardiac troponin I analyte as measured by the Ortho  
26  
27 VITROS hs-cTnI assay in samples stored frozen for over 15 years<sup>14</sup>; with the assay achieving a  
28  
29 precision  $<10\%$  at normal concentrations and thus fulfilling the analytical requirements for a hs-  
30  
31 cTnI assay.<sup>15,28</sup> Finally, additional approaches, such as serial testing with hs-cTn may further  
32  
33 identify patients at low-risk and suitable for discharge; however, ED patients with a CCS  $<1$  at  
34  
35 presentation have a lower mortality rate at 1-year as compared to ED patients with a hs-cTnI  
36  
37 concentration  $<5$  ng/L at presentation (2% versus 5%, respectively).<sup>34</sup>  
38  
39  
40  
41  
42  
43  
44

### 45 ***Conclusion***

46  
47  
48  
49 A CCS  $<1$  with different hs-cTnI assays identifies patients at low-risk for MACE at 30-days,  
50  
51 which cannot be achieved when using hs-cTnI testing alone. An intervention study is needed to  
52  
53 evaluate the impact of the CCS at both the patient and hospital level.  
54  
55  
56  
57  
58  
59  
60

1  
2  
3 Word Count: 2491 (max 2500)  
4  
5  
6  
7  
8  
9

10 Contributors: Peter Kavsak had access to the data in the study and takes responsibility for the  
11 integrity of the data and the accuracy of the data analysis. Peter Kavsak, Andrew Worster, and  
12 Dennis Ko were responsible for concept and design. Peter Kavsak, Joshua O Cerasuolo, Dennis  
13 T Ko, Jinhui Ma, Jonathan Sherbino, Shawn E Mondoux, Natasha Clayton, Stephen A. Hill,  
14 Matthew McQueen, Lauren Griffith, Shamir R. Mehta, Richard Perez, Hsien Seow, PJ  
15 Devereaux, and Andrew Worster acquired, analyzed or interpreted the data. Peter Kavsak and  
16 Andrew Worster drafted the manuscript. Joshua O Cerasuolo, Dennis T Ko, Jinhui Ma, Jonathan  
17 Sherbino, Shawn E Mondoux, Natasha Clayton, Stephen A. Hill, Matthew McQueen, Lauren  
18 Griffith, Shamir R. Mehta, Richard Perez, Hsien Seow, and PJ Devereaux critically revised the  
19 manuscript for important intellectual content. All of the authors gave final approval of the  
20 version to be published and agreed to be accountable for all aspects of the work.  
21  
22  
23  
24  
25  
26  
27  
28  
29  
30  
31  
32  
33  
34  
35  
36  
37  
38  
39

#### 40 **Acknowledgments**

41  
42 This study was supported by ICES, which is funded by an annual grant from the Ontario  
43 Ministry of Health and Long-Term Care (MOHLTC). Content enclosed are based on data  
44 provided by CIHI. Analyses, opinions, and statements expressed herein are those of the authors  
45 and not necessarily those of CIHI; no endorsement is intended or should be inferred. We thank  
46 IMS Brogan Inc. for use of their Drug Information Database.  
47  
48  
49  
50  
51  
52  
53  
54  
55  
56  
57  
58  
59  
60

1  
2  
3 Funding and support: This study was supported by a Canadian Institutes of Health Research  
4 (Funding reference Number 155964) grant with funding by Ortho Clinical Diagnostics to  
5 perform high-sensitivity cardiac troponin I testing in Cohort 1 (Optimum Troponin Cutoffs for  
6 ACS in the ED (ROMI-3) study; ClinicalTrials.gov Identifier: NCT01994577) and by Abbott  
7 Laboratories to perform high-sensitivity cardiac troponin I testing in Cohort 2.  
8  
9  
10  
11  
12  
13  
14

15 Conflict of Interest Disclosures: Dr. Kavsak has received grants/reagents/consultant/advisor/  
16 honoraria from Abbott Laboratories, Abbott Point of Care, Beckman Coulter, Ortho Clinical  
17 Diagnostics, Randox Laboratories, Roche Diagnostics and Siemens Healthcare Diagnostics.  
18  
19

20 McMaster University has filed patents with Drs. Kavsak and Worster listed as an inventor in the  
21 acute cardiovascular biomarker field, in particular, a patent has been filed on aspects related to  
22 the data presented in this study “A LABORATORY SCORE FOR RISK STRATIFICATION  
23 FOR PATIENTS WITH POSSIBLE CARDIAC INJURY”. No other disclosures were reported.  
24  
25  
26  
27  
28  
29  
30  
31  
32  
33  
34  
35  
36  
37  
38  
39  
40  
41  
42  
43  
44  
45  
46  
47  
48  
49  
50  
51  
52  
53  
54  
55  
56  
57  
58  
59  
60



## References

1. Roffi M, Patrono C, Collet JP, et al. 2015 ESC Guidelines for the management of acute coronary syndromes in patients presenting without persistent ST-segment elevation: Task Force for the Management of Acute Coronary Syndromes in Patients Presenting without Persistent ST-Segment Elevation of the European Society of Cardiology (ESC). *Eur Heart J* 2016;37:267-315.
2. Pickering JW, Than MP, Cullen L, et al. Rapid rule-out of acute myocardial Infarction with a single high-sensitivity cardiac troponin T measurement below the limit of detection: A Collaborative Meta-analysis. *Ann Intern Med* 2017;166:715-724.
3. Chapman AR, Lee KK, McAllister DA, et al; Association of high-sensitivity cardiac troponin I concentration with cardiac outcomes in patients with suspected acute coronary syndrome. *JAMA* 2017;318:1913-1924.
4. Thygesen K, Alpert JS, Jaffe AS, Chaitman BR, Bax JJ, Morrow DA, White HD; ESC Scientific Document Group. Fourth universal definition of myocardial infarction (2018). *Eur Heart J* 2019;40:237-269.
5. Greenslade J, Cho E, Van Hise C, et al. Evaluating Rapid Rule-out of Acute Myocardial Infarction Using a High-Sensitivity Cardiac Troponin I Assay at Presentation. *Clin Chem* 2018;64:820-829
6. Sandoval Y, Nowak R, deFilippi CR, et al. Myocardial Infarction Risk Stratification With a Single Measurement of High-Sensitivity Troponin I. *J Am Coll Cardiol* 2019; 74:271-282.

- 1  
2  
3 7. Than M, Herbert M, Flaws D, et al; What is an acceptable risk of major adverse cardiac  
4 event in chest pain patients soon after discharge from the emergency department?: a  
5 clinical survey. *Int J Cardiol* 2013;166:752-4.  
6  
7
- 8  
9  
10  
11 8. American College of Emergency Physicians Clinical Policies Subcommittee (Writing  
12 Committee) on Suspected Non–ST-Elevation Acute Coronary Syndromes:, Tomaszewski  
13 CA, Nestler D, Shah KH, Sudhir A, Brown MD. Clinical Policy: Critical Issues in the  
14 Evaluation and Management of Emergency Department Patients with Suspected Non-ST-  
15 Elevation Acute Coronary Syndromes. *Ann Emerg Med* 2018;72:e65-e106.  
16  
17
- 18  
19  
20  
21 9. Peacock WF, Baumann BM, Bruton D, et al. Efficacy of High-Sensitivity Troponin T in  
22 Identifying Very-Low-Risk Patients With Possible Acute Coronary Syndrome. *JAMA*  
23 *Cardiol* 2018;3:104-111.  
24  
25  
26  
27
- 28  
29  
30  
31 10. Kavsak PA, Neumann JT, Cullen L, et al. Clinical chemistry score versus high-sensitivity  
32 cardiac troponin I and T tests alone to identify patients at low or high risk for myocardial  
33 infarction or death at presentation to the emergency department. *CMAJ* 2018;190:E974-  
34 E984.  
35  
36  
37  
38
- 39  
40  
41 11. Raizman JE, Fuezery A, Tsui AKY, et al. Multicenter comparison of imprecision at low  
42 concentrations of two regulatory approved high-sensitivity cardiac troponin I assays. *Clin*  
43 *Chim Acta* 2018;486:219-220.  
44  
45  
46  
47
- 48  
49 12. Kavsak PA, Worster A, Hill SA, Jaffe AS. Evaluation of the Siemens ADVIA Centaur  
50 high-sensitivity cardiac troponin I assay in serum. *Clin Chim Acta* 2018;487:216-221.  
51  
52  
53  
54  
55  
56  
57  
58  
59  
60

- 1  
2  
3 13. Kavsak PA, MacCuish J, Boreyko J, Roy C, Lamers S, Clark L. Analytical  
4  
5 characterization of the Siemens Dimension EXL high-sensitivity cardiac troponin I assay.  
6  
7 *Clin Biochem* 2019;69:52-56.  
8  
9
- 10 14. Kavsak PA, Clark L, Caruso N, et al. Macrocomplexes and high-sensitivity cardiac  
11  
12 troponin assays in samples stored for over 15 years. *Clin Chim Acta* 2020; accepted.  
13  
14  
15
- 16 15. Wu AHB, Christenson R, Greene D, et al; Clinical laboratory practice recommendations  
17  
18 for the use of cardiac troponin in acute coronary syndrome: expert opinion from the  
19  
20 Academy of the American Association for Clinical Chemistry and the Task Force on  
21  
22 Clinical Applications of Cardiac Bio-Markers of the International Federation of Clinical  
23  
24 Chemistry and Laboratory Medicine. *Clin Chem* 2018;64:645-655.  
25  
26  
27
- 28 16. Kavsak PA, Ainsworth C, Clark L, Devereaux PJ, Worster A. Four Different High-  
29  
30 Sensitivity Cardiac Troponin Assays With Important Analytical Performance  
31  
32 Differences. *Can J Cardiol* 2019;35:796.e17-796.e18.  
33  
34
- 35 17. Shortt C, Ma J, Clayton N, et al; Rule-In and rule-out of myocardial infarction using  
36  
37 cardiac troponin and glyceic biomarkers in patients with symptoms suggestive of acute  
38  
39 coronary syndrome. *Clin Chem* 2017;63:403-414.  
40  
41
- 42 18. Kavsak PA, Worster A, Ma J, et al; High-sensitivity cardiac troponin risk cutoffs for  
43  
44 acute cardiac outcomes at emergency department presentation. *Can J Cardiol*  
45  
46 2017;33:898-903.  
47  
48
- 49 19. Neumann JT, Twerenbold R, Ojeda F, et al. Application of High-Sensitivity Troponin in  
50  
51 Suspected Myocardial Infarction. *N Engl J Med* 2019;380:2529-2540.  
52  
53  
54  
55  
56  
57  
58  
59  
60

- 1  
2  
3 20. Kavsak PA, Shortt C, Pond G, Worster A. High-sensitivity cardiac troponin I for  
4  
5 predicting death in a female emergency department population *Clin Chem* 2014; 60:271-  
6  
7 273.  
8  
9  
10 21. Lau G, Koh M, Kavsak PA, et al. Clinical outcomes for chest pain patients discharged  
11  
12 home from emergency departments using high-sensitivity versus conventional cardiac  
13  
14 troponin assays. *Am Heart J*. 2020 Mar;221:84-94.  
15  
16  
17 22. Kavsak PA, Roy C, Malinowski P, et al. Macrocomplexes and discordant high-sensitivity  
18  
19 cardiac troponin concentrations. *Ann Clin Biochem* 2018;55:500-504  
20  
21  
22 23. Kavsak PA, Roy C, Malinowski P, et al. Sample matrix and high-sensitivity cardiac  
23  
24 troponin I assays. *Clin Chem Lab Med* 2019;57:745-751.  
25  
26  
27 24. Kavsak PA, Petryayeva E, Clark L. Analytical Variation and Abbott Diagnostics High-  
28  
29 Sensitivity Cardiac Troponin I Risk Categories in Asymptomatic Individuals. *Can J*  
30  
31 *Cardiol* 2019;35:1605.e7-1605.e8.  
32  
33  
34 25. Kavsak PA, Worster A, Hill SA, MacRae AR, Jaffe AS. Analytical comparison of three  
35  
36 different versions of a high-sensitivity cardiac troponin I assay over 10years. *Clin Chim*  
37  
38 *Acta* 2017;475:51–55.  
39  
40  
41 26. Levey AS1, Stevens LA, Schmid CH, et al. A new equation to estimate glomerular  
42  
43 filtration rate. *Ann Intern Med* 2009;150:604-12.  
44  
45  
46 27. Eggers KM, Jernberg T, Ljung L, Lindahl B. High-Sensitivity Cardiac Troponin-Based  
47  
48 Strategies for the Assessment of Chest Pain Patients-A Review of Validation and Clinical  
49  
50 Implementation Studies. *Clin Chem* 2018;64:1572-1585.  
51  
52  
53  
54  
55  
56  
57  
58  
59  
60

- 1  
2  
3 28. Boeddinghaus J, Twerenbold R, Nestelberger T, et al. Clinical Use of a New High-  
4  
5 Sensitivity Cardiac Troponin I Assay in Patients with Suspected Myocardial Infarction.  
6  
7 *Clin Chem* 2019;65:1426-1436.  
8  
9
- 10 29. Apple FS, Wu AH, Sandoval Y, et al. Sex-Specific 99th Percentile Upper Reference  
11  
12 Limits for High Sensitivity Cardiac Troponin Assays Derived Using a Universal Sample  
13  
14 Bank. *Clin Chem* – in press, hvz029, <https://doi.org/10.1093/clinchem/hvz029>  
15  
16
- 17 30. Kufaishi H, Pardhan A, Krizmanich W, Worster A, Hill S, Kavsak PA. Adopting 'ng/L'  
18  
19 as the units for high-sensitivity cardiac troponin assays and commitment by the entire  
20  
21 health-care team could be the key for adopting recommendations. *Ann Clin Biochem*  
22  
23 2016;53:516-7.  
24  
25
- 26 31. Lyon AW, Kavsak PA, Lyon OA, Worster A, Lyon ME. Simulation Models of  
27  
28 Misclassification Error for Single Thresholds of High-Sensitivity Cardiac Troponin I Due  
29  
30 to Assay Bias and Imprecision. *Clin Chem* 2017;63:585-592.  
31  
32
- 33 32. Kavsak PA. External Quality Assessment Testing Near the Limit of Detection for High-  
34  
35 Sensitivity Cardiac Troponin Assays. *Clin Chem* 2018;64:1402-1404.  
36  
37
- 38 33. Kavsak PA, McRae A, Vatanpour S, Ismail OZ, Worster A. A Multicenter Assessment of  
39  
40 the Sensitivity and Specificity for a Single High-Sensitivity Cardiac Troponin Test at  
41  
42 Emergency Department Presentation for Hospital Admission. *J Appl Lab Med*  
43  
44 2019;4:170-179.  
45  
46
- 47 34. Kavsak PA, Cerasuolo JO, Ko DT, et al. High-sensitivity cardiac troponin I versus a  
48  
49 clinical chemistry score for predicting all-cause mortality in an emergency department  
50  
51 population. *CJC Open* – accepted.  
52  
53  
54  
55  
56  
57  
58  
59  
60

1  
2  
3  
4  
5  
6  
7  
8  
9  
10  
11  
12  
13  
14  
15  
16  
17  
18  
19  
20  
21  
22  
23  
24  
25  
26  
27  
28  
29  
30  
31  
32  
33  
34  
35  
36  
37  
38  
39  
40  
41  
42  
43  
44  
45  
46  
47  
48  
49  
50  
51  
52  
53  
54  
55  
56  
57  
58  
59  
60

Figure 1. Flow diagram of the two different ED cohorts. Cohort 1 is from the ROMI-3 study and Cohort 2 are all consecutive ED patients that had an ED cardiac presentation blood panel resulted.

Confidential

Table 1. Demographics of the two ED study cohorts with mean (SD) or number (percentages) provided.

| Variables                                                        | Cohort 1<br>(n=1058) | Cohort 2<br>(n=5974) |
|------------------------------------------------------------------|----------------------|----------------------|
| Age in years, mean (SD)                                          | 67 (17)              | 68 (17)              |
| Female sex, n (%)                                                | 558 (53%)            | 3025 (51%)           |
| Hypertension, n (%)                                              | 744 (70%)            | 4045 (68%)           |
| Diabetes mellitus, n (%)                                         | 312 (29%)            | 1961 (33%)           |
| History of MI, n (%)                                             | 378 (36%)            | 674 (11%)            |
| History of PCI or CABG, n (%)                                    | 236 (22%)            | 453 (8%)             |
| History of stroke, n (%)                                         | 176 (17%)            | 186 (3%)             |
| History of peripheral vascular disease, n (%)                    | 75 (7%)              | 742 (12%)            |
| Glucose mmol/L, mean (SD)                                        | 7.4 (3.6)            | 7.6 (4.4)            |
| eGFR mL/min/1.73 m <sup>2</sup> , mean (SD)                      | 72 (27)              | 69 (27)              |
| Presentation hs-cTnI <99 <sup>th</sup> percentile cutoff*, n (%) | 842 (80%)            | 4698 (79%)           |
| 30-day MACE, n (%)                                               | 205 (19.4%)          | 871(14.6%)           |

\*99<sup>th</sup> percentile upper reference limit is 11 ng/L for Ortho hs-cTnI assay and 26 ng/L for Abbott hs-cTnI assay  
 PCI=percutaneous coronary intervention; CABG=coronary artery bypass grafting

Table 2. Sensitivity, specificity, NPV, PPV, and 30-day MACE with the clinical chemistry score (CCS) versus hs-cTnI alone in cohort 1 using the Ortho VITROS hs-cTnI assay

| Method, number of patients in this group, (% from 1058)          | 30-day MACE, n (%) | Sensitivity % (95%CI)  | Specificity % (95%CI)  | NPV % (95%CI)          | PPV % (95%CI)          |
|------------------------------------------------------------------|--------------------|------------------------|------------------------|------------------------|------------------------|
| CCS $\geq$ 1 cutoff<br>[CSS <1 in n=110 (10.4%)]                 | 1 (0.9%)           | 99.5% (97.3% to 99.9%) | 12.8% (10.6% to 15.2%) | 99.1% (93.9% to 99.9%) | 21.5% (21.1% to 21.9%) |
| hs-cTnI $\geq$ 1 ng/L cutoff<br>[hsTnI <1 ng/L in n=352 (33.3%)] | 18 (5.1%)          | 91.2% (86.5% to 94.7%) | 39.2% (35.9% to 42.5%) | 94.9% (92.2% to 96.7%) | 26.5% (25.1% to 27.8%) |
| hs-cTnI $\geq$ 5 ng/L cutoff<br>[hsTnI <5 ng/L in n=722 (68.3%)] | 53 (7.3%)          | 74.2% (67.6% to 80.0%) | 78.5% (75.6% to 81.2%) | 92.7% (90.9% to 94.1%) | 45.4% (41.6% to 49.2%) |



Table 3. Sensitivity, specificity, NPV, PPV, and 90-day MACE with the clinical chemistry score (CCS) versus hs-cTnI alone in cohort 2 using the Abbott ARCHITECT hs-cTnI assay. Note at 30-days, MACE occurred in  $\leq 5$  patients with a CCS  $< 1$ .

| Cutoff, number of patients in this group, (% of 5974 total)          | 90-day MACE, n (%) | Sensitivity % (95%CI)     | Specificity % (95%CI)     | NPV % (95%CI)             | PPV % (95%CI)             |
|----------------------------------------------------------------------|--------------------|---------------------------|---------------------------|---------------------------|---------------------------|
| CCS $\geq 1$ cutoff<br>[CSS $< 1$ in n=399 (6.7%)]                   | 8<br>(2.0%)        | 99.2%<br>(98.5% to 99.6%) | 8.0%<br>(7.2% to 8.8%)    | 97.9%<br>(96.0% to 99.1%) | 19.5%<br>(18.5% to 20.6%) |
| hs-cTnI $\geq 5$ ng/L cutoff<br>[hsTnI $< 5$ ng/L in n=2374 (39.7%)] | 135<br>(5.7%)      | 87.7%<br>(85.6% to 89.6%) | 45.9%<br>(44.5% to 47.3%) | 94.3%<br>(93.3% to 95.2%) | 26.8%<br>(25.3% to 28.2%) |

## Supplemental Methods

### Health Outcome Adjudication in Cohort 1

#### Death and Myocardial Infarction:

In the Hamilton cohort, an emergency physician led an adjudication panel with the outcomes independently adjudicated by at least two members with disagreements not resolved by consensus referred to a third blinded reviewer using the Third Universal Definition of Myocardial Infarction as the basis for the diagnosis of MI.<sup>10</sup> Participants were followed for at least 30-days for mortality status and MI. For the MI outcome, the contemporary Abbott cTnI (ug/L) assay was used with a cTnI concentration of  $>0.03$  ug/L ( $>99$ th) with a significant rise/fall (absolute delta  $\geq 0.03$  ug/L for concentrations  $<0.10$  ug/L or proportional changes of  $\geq 20\%$  for concentrations  $\geq 0.10$  ug/L, from  $n=1367$  subsequent cTnI measurements with the median time (interquartile range) between 2nd and 1st samples = 3.03h (2.97-3.17)), or new ST segment elevation or depression indicative of ischemia; new left bundle branch block; coronary artery intervention or pathologic findings of an acute MI.

#### Unstable Angina and Revascularization:

Unstable angina (UA) was diagnosed when any of the following criteria were met: a discharge diagnosis of UA as per discharge summary and/or admission to hospital with ACS treatment [heparin or low molecular weight heparin, cardiac catheterization resulting in increased treatment (i.e., Plavix/ASA or revascularization)].

1  
2  
3 Health Outcome in Cohort 2

4  
5 *Diagnosis/intervention codes used for clinical endpoint (MACE)*

6  
7

| <u>Outcome</u>               | <u>Data source</u> | <u>Codes</u>                                                             |
|------------------------------|--------------------|--------------------------------------------------------------------------|
| <u>All-cause mortality</u>   | <u>RPDB</u>        | <u>Not applicable</u>                                                    |
| <u>Myocardial infarction</u> | <u>DAD</u>         | <u>Diagnosis codes (ICD-10):</u><br><u>I21 or I22</u>                    |
| <u>Angina</u>                | <u>DAD</u>         | <u>Diagnosis codes (ICD-10):</u><br><u>I20, I2382, or I24</u>            |
| <u>CABG</u>                  | <u>DAD</u>         | <u>Intervention codes (CCI):</u><br><u>1IJ76 or 1IJ80</u>                |
| <u>PCI</u>                   | <u>DAD or SDS</u>  | <u>Intervention codes (CCI):</u><br><u>1IJ26, 1IJ50, 1IJ55, or 1IJ57</u> |

8  
9  
10  
11  
12  
13  
14  
15  
16  
17  
18  
19  
20  
21  
22  
23  
24  
25  
26  
27  
28  
29  
30  
31  
32  
33  
34  
35  
36  
37  
38  
39  
40  
41  
42  
43  
44  
45  
46  
47  
48  
49  
50  
51  
52  
53  
54  
55  
56  
57  
58  
59  
60

# Cohort 1

1 Screened Patients (May 2013 to August 2013)  
(≥18, not transferred, cTnI order by ERP)  
**N=1845**

Excluded N=479

- No ACS Symptoms **n=286**
- Chest trauma, cardiac surgery or cardiac manipulation within previous 30 days **n=25**
- STEMI, NSTEMI, or pulmonary embolus confirmed within previous 30 days **n=12**
- Known active malignancy or non-cardiac fatal illness **n=111**
- History that suggests new infection + sepsis **n=81**
- ST-elevation myocardial infarction (STEMI) **n=21**
- Ventricular fibrillation or sustained ventricular tachycardia **n=3**

(Note: some patients excluded for multiple reasons)

9 Eligible Patients  
**N=1366**

13 No Abbott hs-cTnI /Roche hs-cTnT at Presentation  
**N=200**

16 Presentation hs-cTnI & hs-cTnT results  
**N=1166**

19 No presentation glucose/eGFR **N=31**

22 Presentation hs-cTnI & hs-cTnT results  
**N=1135**

26 Lost to Follow-up at 30 days **N=43**

28 Presentation Abbott hs-cTnI, Roche hs-cTnT, glucose, & eGFR **N=1092**

32 No presentation Ortho hs-cTnI result **N=34**

35 Presentation Ortho hs-cTnI, Glucose & eGFR for CCS **N=1058**

39 4030-day MACE  
**N=205**

41 No 30-day Outcome  
**N=853**

# Cohort 2

All patients who visited ED with a contemporary cTnI result from November 2012 to February 2013  
**N=6641**

Excluded N=625  
All 3 laboratory tests (glucose, eGFR, Abbott hs-cTnI) not performed upon ED arrival, or missing age or sex in RPDP, or not an Ontario resident

Patients with all variables needed for CCS calculation and linkage to databases  
**N=6016**

Not OHIP-eligible at baseline **N=42**

Cohort of undifferentiated ED patients with cardiac panel ordered at presentation with Abbott hs-cTnI, glucose, eGFR for CCS  
**N=5974**

30-day MACE  
**N=871**

No 30-day Outcome  
**N=5103**

| Section & Topic          | No  | Item                                                                                                                                                   | Reported on page # |
|--------------------------|-----|--------------------------------------------------------------------------------------------------------------------------------------------------------|--------------------|
| <b>TITLE OR ABSTRACT</b> |     |                                                                                                                                                        |                    |
|                          | 1   | Identification as a study of diagnostic accuracy using at least one measure of accuracy (such as sensitivity, specificity, predictive values, or AUC)  | 2                  |
| <b>ABSTRACT</b>          |     |                                                                                                                                                        |                    |
|                          | 2   | Structured summary of study design, methods, results, and conclusions (for specific guidance, see STARD for Abstracts)                                 | 2,3                |
| <b>INTRODUCTION</b>      |     |                                                                                                                                                        |                    |
|                          | 3   | Scientific and clinical background, including the intended use and clinical role of the index test                                                     | 4                  |
|                          | 4   | Study objectives and hypotheses                                                                                                                        | 4,5                |
| <b>METHODS</b>           |     |                                                                                                                                                        |                    |
| <i>Study design</i>      | 5   | Whether data collection was planned before the index test and reference standard were performed (prospective study) or after (retrospective study)     | 5,6                |
| <i>Participants</i>      | 6   | Eligibility criteria                                                                                                                                   | 5,6                |
|                          | 7   | On what basis potentially eligible participants were identified (such as symptoms, results from previous tests, inclusion in registry)                 | 5,6                |
|                          | 8   | Where and when potentially eligible participants were identified (setting, location and dates)                                                         | 5,6                |
|                          | 9   | Whether participants formed a consecutive, random or convenience series                                                                                | 5,6                |
| <i>Test methods</i>      | 10a | Index test, in sufficient detail to allow replication                                                                                                  | 6,7                |
|                          | 10b | Reference standard, in sufficient detail to allow replication                                                                                          | 6,7                |
|                          | 11  | Rationale for choosing the reference standard (if alternatives exist)                                                                                  | 6,7                |
|                          | 12a | Definition of and rationale for test positivity cut-offs or result categories of the index test, distinguishing pre-specified from exploratory         | 7,8                |
|                          | 12b | Definition of and rationale for test positivity cut-offs or result categories of the reference standard, distinguishing pre-specified from exploratory | 7,8                |
|                          | 13a | Whether clinical information and reference standard results were available to the performers/readers of the index test                                 | 5-8                |
|                          | 13b | Whether clinical information and index test results were available to the assessors of the reference standard                                          | 5-8                |
| <i>Analysis</i>          | 14  | Methods for estimating or comparing measures of diagnostic accuracy                                                                                    | 8,9                |
|                          | 15  | How indeterminate index test or reference standard results were handled                                                                                | 8,9                |
|                          | 16  | How missing data on the index test and reference standard were handled                                                                                 | 5-9                |
|                          | 17  | Any analyses of variability in diagnostic accuracy, distinguishing pre-specified from exploratory                                                      | 5-9                |
|                          | 18  | Intended sample size and how it was determined                                                                                                         | 5,6                |
| <b>RESULTS</b>           |     |                                                                                                                                                        |                    |
| <i>Participants</i>      | 19  | Flow of participants, using a diagram                                                                                                                  | Figure 1           |
|                          | 20  | Baseline demographic and clinical characteristics of participants                                                                                      | Table 1            |
|                          | 21a | Distribution of severity of disease in those with the target condition                                                                                 | 9,10               |
|                          | 21b | Distribution of alternative diagnoses in those without the target condition                                                                            | 9,10               |
|                          | 22  | Time interval and any clinical interventions between index test and reference standard                                                                 | 9,10               |
| <i>Test results</i>      | 23  | Cross tabulation of the index test results (or their distribution) by the results of the reference standard                                            | 9,10               |
|                          | 24  | Estimates of diagnostic accuracy and their precision (such as 95% confidence intervals)                                                                | 9,10               |
|                          | 25  | Any adverse events from performing the index test or the reference standard                                                                            | 12                 |
| <b>DISCUSSION</b>        |     |                                                                                                                                                        |                    |
|                          | 26  | Study limitations, including sources of potential bias, statistical uncertainty, and generalisability                                                  | 11,12              |
|                          | 27  | Implications for practice, including the intended use and clinical role of the index test                                                              | 10-12              |
| <b>OTHER INFORMATION</b> |     |                                                                                                                                                        |                    |
|                          | 28  | Registration number and name of registry                                                                                                               | 5                  |
|                          | 29  | Where the full study protocol can be accessed                                                                                                          | Not applicable     |
|                          | 30  | Sources of funding and other support; role of funders                                                                                                  | 14                 |

# STARD 2015

---

## AIM

STARD stands for “Standards for Reporting Diagnostic accuracy studies”. This list of items was developed to contribute to the completeness and transparency of reporting of diagnostic accuracy studies. Authors can use the list to write informative study reports. Editors and peer-reviewers can use it to evaluate whether the information has been included in manuscripts submitted for publication.

---

## EXPLANATION

A **diagnostic accuracy study** evaluates the ability of one or more medical tests to correctly classify study participants as having a **target condition**. This can be a disease, a disease stage, response or benefit from therapy, or an event or condition in the future. A medical test can be an imaging procedure, a laboratory test, elements from history and physical examination, a combination of these, or any other method for collecting information about the current health status of a patient.

The test whose accuracy is evaluated is called **index test**. A study can evaluate the accuracy of one or more index tests. Evaluating the ability of a medical test to correctly classify patients is typically done by comparing the distribution of the index test results with those of the **reference standard**. The reference standard is the best available method for establishing the presence or absence of the target condition. An accuracy study can rely on one or more reference standards.

If test results are categorized as either positive or negative, the cross tabulation of the index test results against those of the reference standard can be used to estimate the **sensitivity** of the index test (the proportion of participants *with* the target condition who have a positive index test), and its **specificity** (the proportion *without* the target condition who have a negative index test). From this cross tabulation (sometimes referred to as the contingency or “2x2” table), several other accuracy statistics can be estimated, such as the positive and negative **predictive values** of the test. Confidence intervals around estimates of accuracy can then be calculated to quantify the statistical **precision** of the measurements.

If the index test results can take more than two values, categorization of test results as positive or negative requires a **test positivity cut-off**. When multiple such cut-offs can be defined, authors can report a receiver operating characteristic (ROC) curve which graphically represents the combination of sensitivity and specificity for each possible test positivity cut-off. The **area under the ROC curve** informs in a single numerical value about the overall diagnostic accuracy of the index test.

The **intended use** of a medical test can be diagnosis, screening, staging, monitoring, surveillance, prediction or prognosis. The **clinical role** of a test explains its position relative to existing tests in the clinical pathway. A replacement test, for example, replaces an existing test. A triage test is used before an existing test; an add-on test is used after an existing test.

Besides diagnostic accuracy, several other outcomes and statistics may be relevant in the evaluation of medical tests. Medical tests can also be used to classify patients for purposes other than diagnosis, such as staging or prognosis. The STARD list was not explicitly developed for these other outcomes, statistics, and study types, although most STARD items would still apply.

---

## DEVELOPMENT

This STARD list was released in 2015. The 30 items were identified by an international expert group of methodologists, researchers, and editors. The guiding principle in the development of STARD was to select items that, when reported, would help readers to judge the potential for bias in the study, to appraise the applicability of the study findings and the validity of conclusions and recommendations. The list represents an update of the first version, which was published in 2003.

More information can be found on <http://www.equator-network.org/reporting-guidelines/stard>.

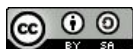

Supplement: 2020-0047-original-submission.pdf [file 2020-0047-original-submission.pdf]
